# Supplementary material for: Establishment and molecular characterisation of seven novel soft-tissue sarcoma cell lines
Source: PubMed Central journal article supplement — Br J Cancer. 2016 Aug 25;115(9):1058–68. doi: 10.1038/bjc.2016.259 (PMC5117779; doi:10.1038/bjc.2016.259), 2016-08-25
Supplement: bjc2016259x1.pdf [file bjc2016259x1.pdf]

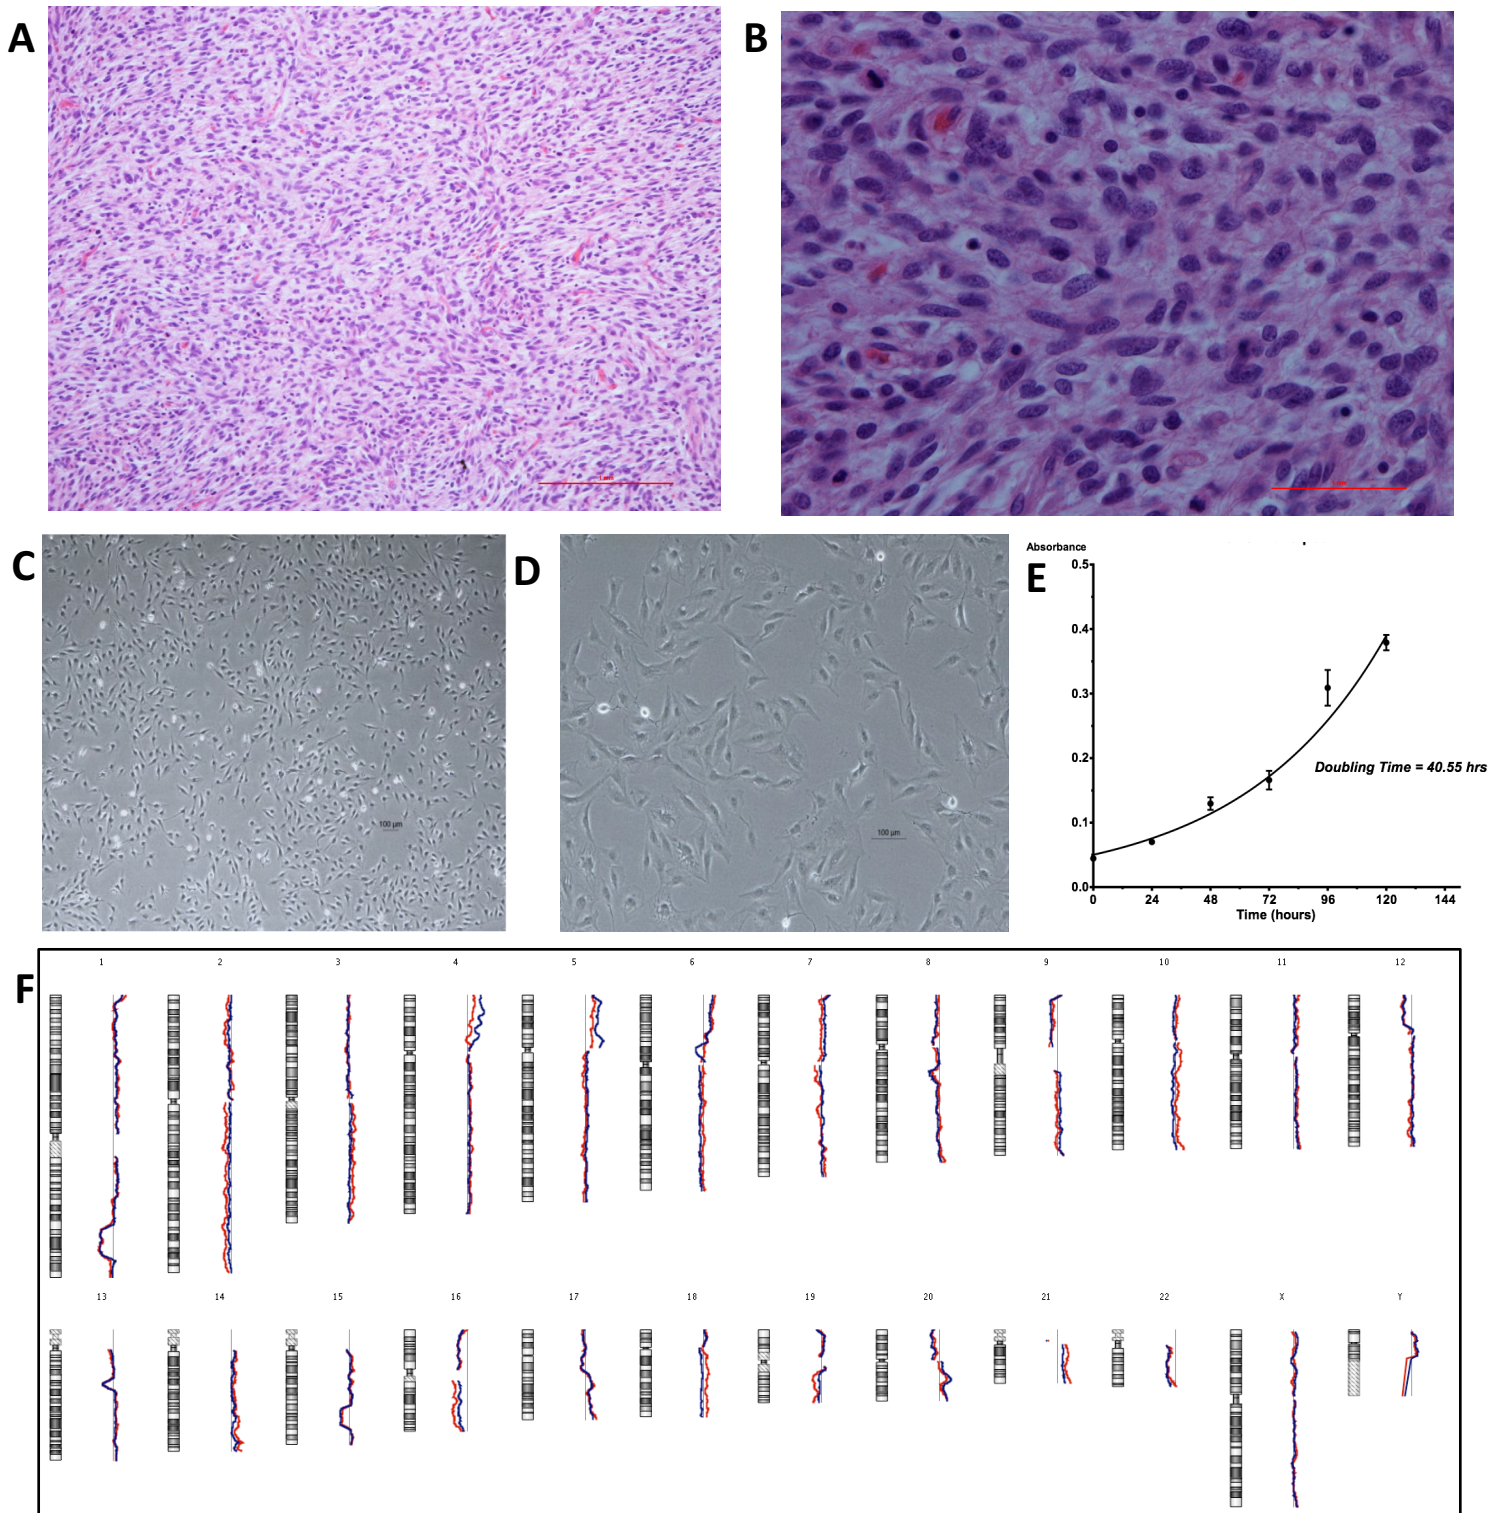

**Figure S1:** Phenotypic and genomic characteristics of Shef-UPS 01 cell line.

**A and B:** Photomicrographs of haematoxylin & eosin-stained sections of the parent tumour, a primary undifferentiated pleomorphic sarcoma taken at low- (x100) and high- (x400) magnification, respectively. Scale bars = 1mm.

Cultures were established in the original setup **C and D:** Phase contrast micrographs of the cells at passage 72 at low and higher magnification, respectively. Scale Bars = 100µm **E:** Growth curve and doubling time of tumour cells at passage 69 as evaluated by MTT proliferation assay. Doubling Time = 40.55 hours

**F:** Genomic Copy number profile of cells at passage 5 compared with the parent tumour from which the culture was derived. The overlaid red and blue lines represent the moving average of  $\log_2$  ratios of the cultured cells and parent tumour tissue, respectively. Deviations above and below the horizontal baseline represent amplifications and deletions, respectively. Relative amplitude of deviation shows the  $\log_2$  ratio and represents DNA copy number at the corresponding genomic locus.

*Copy number analysis was performed on the Agilent® 4 x 180K DNA microarray platform and data analysed using Agilent® Genomic Workbench Software v6.0. Growth Curve fitting and doubling time calculation were done using GraphPad® Prism Software (v6.0) based on experiments done in quadruplicate.*
