# Supplementary material for: Establishment and molecular characterisation of seven novel soft-tissue sarcoma cell lines
Source: PubMed Central journal article supplement — Br J Cancer. 2016 Aug 25;115(9):1058–68. doi: 10.1038/bjc.2016.259 (PMC5117779; doi:10.1038/bjc.2016.259), 2016-08-25
Supplement: bjc2016259x4.pdf [file bjc2016259x4.pdf]

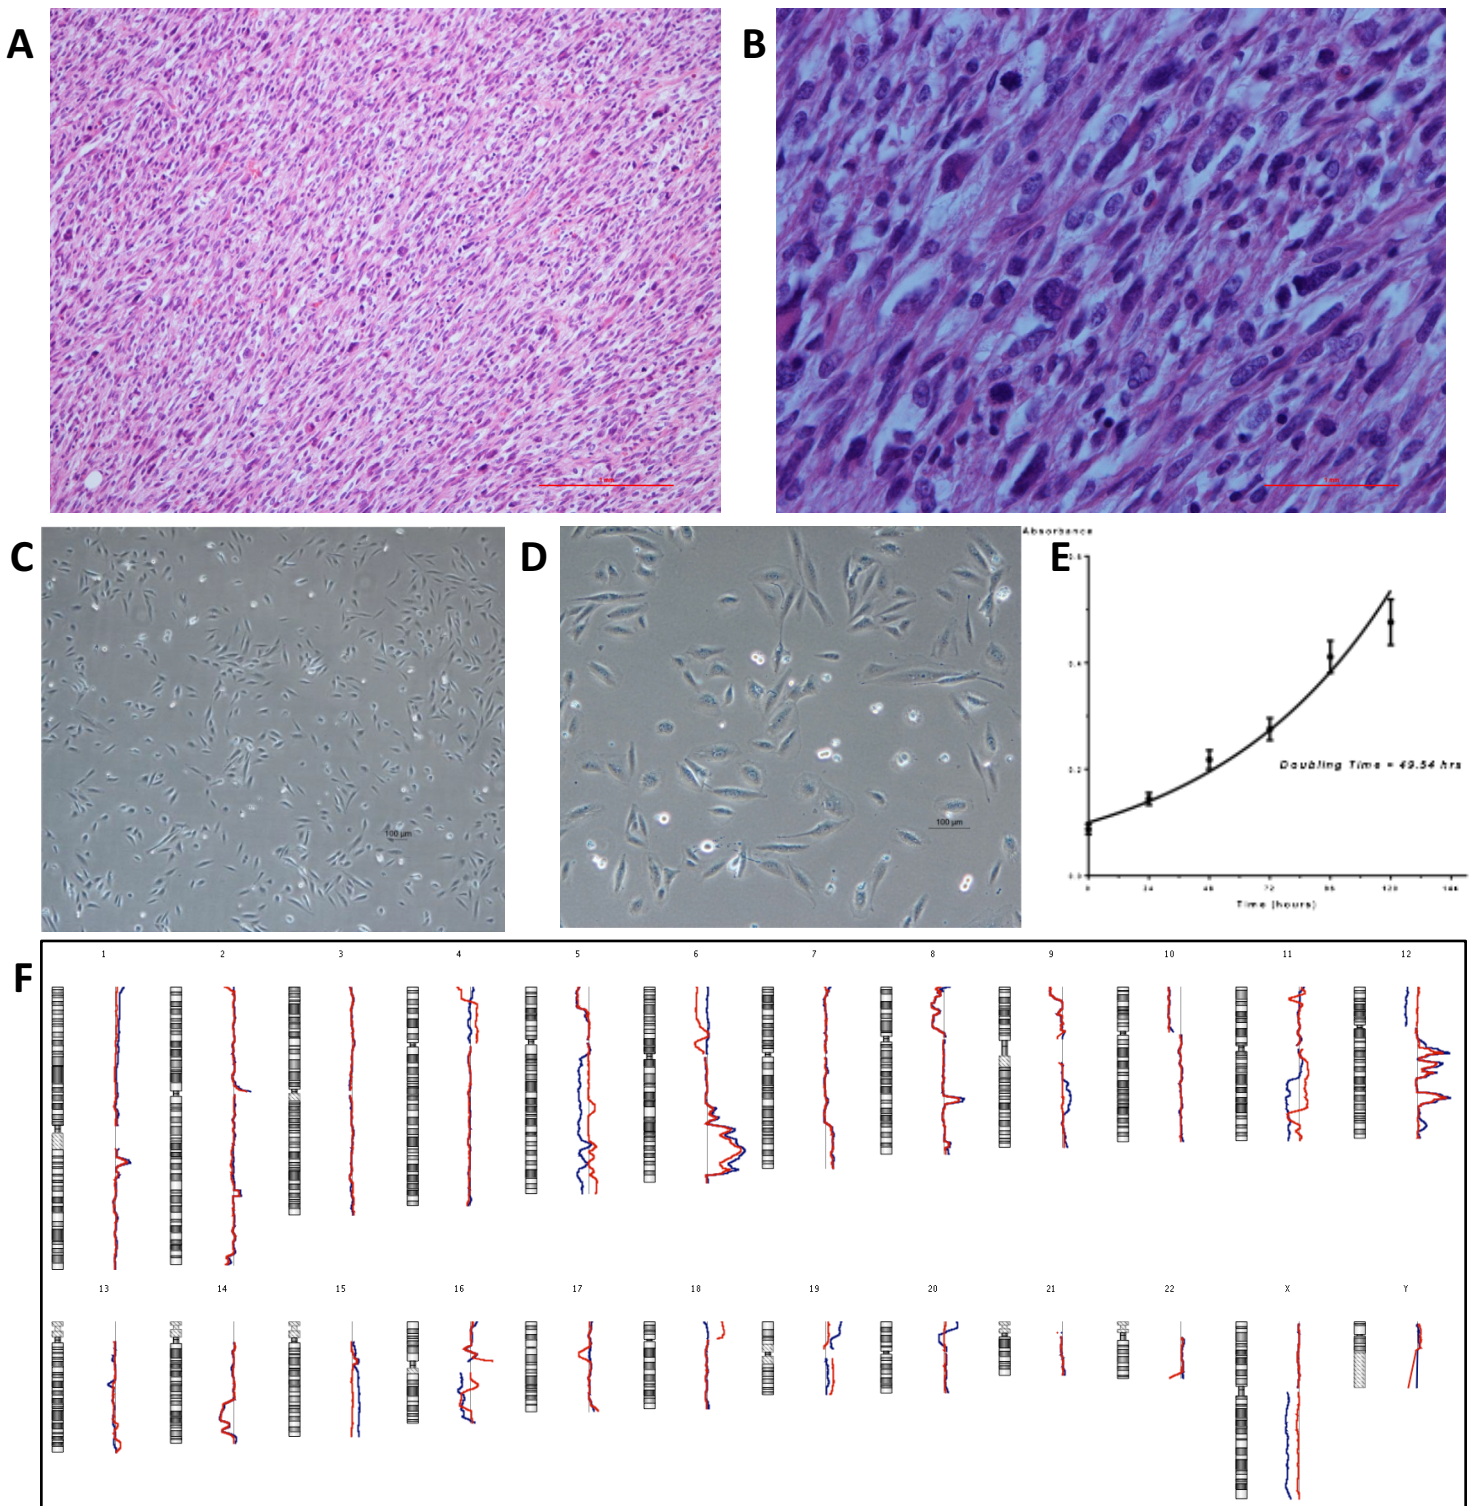

**Figure S4:** Phenotypic and genomic characteristics of Shef-DDLPS 01 cell line.

**A and B:** Photomicrographs of haematoxylin & eosin-stained sections of the parent tumour, a primary de-differentiated liposarcoma taken at low- (x100) and high- (x400) magnification, respectively. Scale bars = 1mm. Cultures were established in the second wash of initially non-adherent cells taken off the original culture setup ( $w_2$ ).

**C and D:** Phase contrast micrographs of the cells at passage 71 at low and high magnification, respectively. Scale Bars = 100 $\mu$ m **E:** Growth curve and doubling time of tumour cells at passage 70 as evaluated by MTT proliferation assay. Doubling Time = 49.54 hours

**F:** Genomic Copy number profile of cells at passage 35 compared with the parent tumour from which the culture was derived. The overlaid red and blue lines represent the moving average of  $\log_2$  ratios of the cultured cells and parent tumour tissue, respectively. Deviations above and below the horizontal baseline represent amplifications and deletions, respectively. Relative amplitude of deviation shows the  $\log_2$ ratio and represents DNA copy number at the corresponding genomic locus.

Copy number analysis was performed on the Agilent® 4 x 180K DNA microarray platform and data analysed using Agilent® Genomic Workbench Software v6.0. Growth curve fitting and doubling time calculation were done using GraphPad® Prism Software (v6.0) based on experiments done in quadruplicate.
